# Supplementary material for: Information-processing dynamics in neural networks of macaque cerebral cortex reflect cognitive state and behavior
Source: PubMed Central journal article supplement — Proc Natl Acad Sci U S A. 2023 Jan 5;120(2):e2207677120. doi: 10.1073/pnas.2207677120 (PMC9926243; doi:10.1073/pnas.2207677120), 2023-01-05
Supplement: pnas.2207677120.sapp.pdf [file pnas.2207677120.sapp.pdf]

# PNAS



1

## 2 **Supporting Information for**

3 **Information processing dynamics in neural networks of macaque cerebral cortex reflect**  
4 **cognitive state and behavior.**

5 **Thomas F. Varley, Olaf Sporns, Stefan Schaffelhofer, Hansjörg Scherberger, Benjamin Dann**

6 **Thomas F Varley.**

7 **E-mail: [tvarley@iu.edu](mailto:tvarley@iu.edu)**

### 8 **This PDF file includes:**

9 Supporting text

10 Figs. S1 to S2

11 SI References

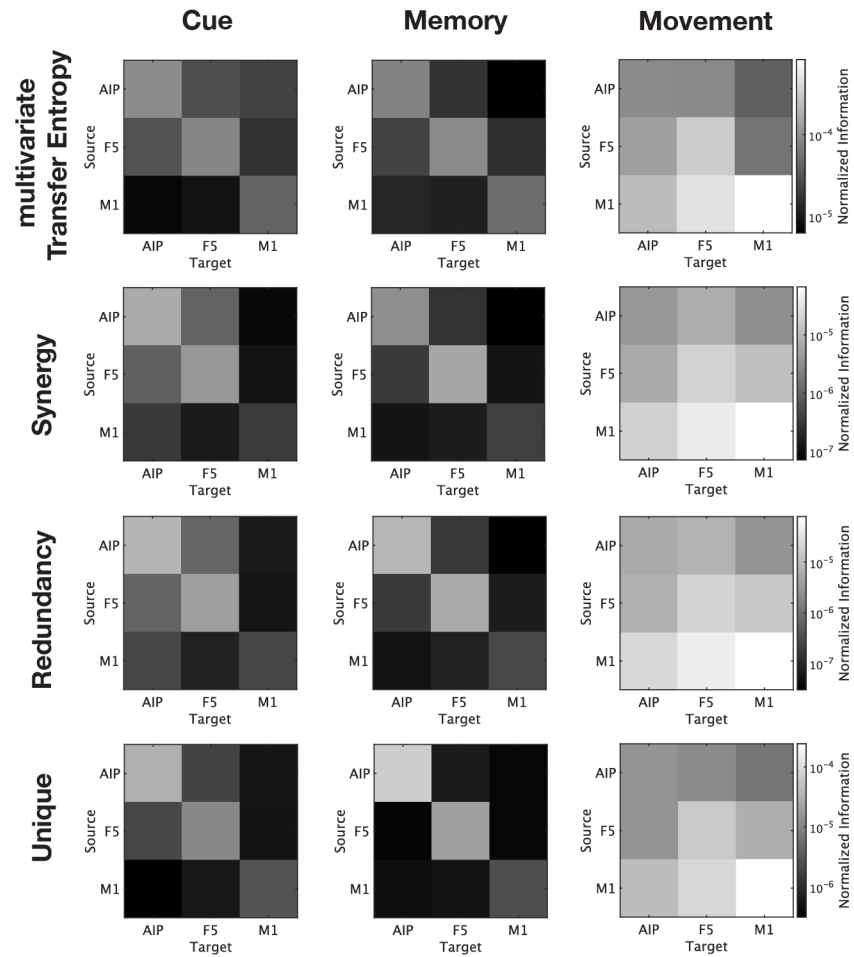

**Fig. S1. Behavioral state dependent changes of different types of information processing within and between cortical areas.** Displayed as adjacency matrices are the relative strength of the information dynamics: mTE, synergy, redundancy, and unique). Information dynamics within and between the areas (AIP, F5, M1), in the feedforward and feedback direction, are shown for the three behavioral epochs: cue, memory, and movement (averaged across all sliding windows per epoch). Similar to Fig. S1, all displayed information dynamics are averaged across all neural connections within each area or between each area-pair and all recording sessions of all three monkeys. While information processing is largely consistent across all types of measures, large differences are apparent between behavioral epochs. Moreover, during movement execution, information processing is noticeably stronger in the feedback direction than in the feedforward direction.

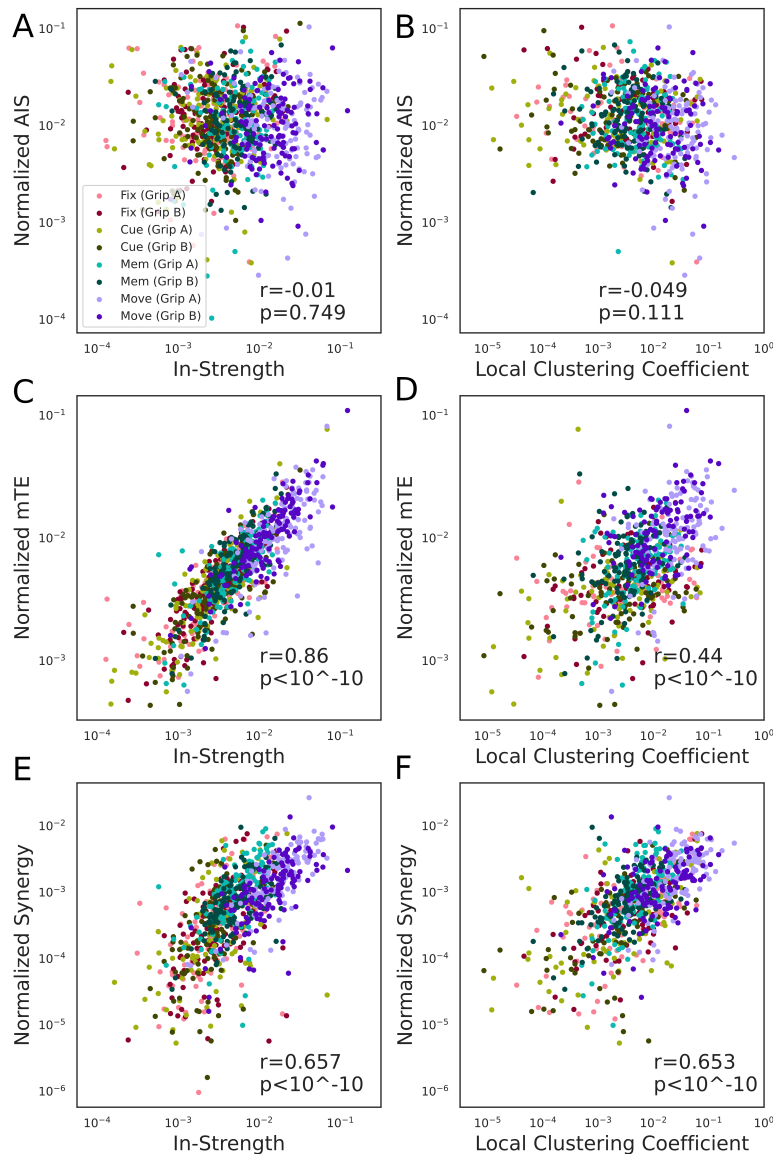

**Fig. S2. Relationship of Information dynamics and local network structure.** Displayed is how neuron-level information dynamics are related to neuron-level network measures (Spearman correlation coefficient). Network measures and information dynamics are averaged across all sliding windows per behavioral period, both grasping conditions and all recording sessions of all monkeys. The color scheme is the same as in Fig. 4 **A-B**. We found no significant relationship between active information storage and the in-strength of a neuron or the local clustering coefficient. **C** There was a highly significant correlation between the average transfer entropy of a neuron and its in-strength ( $r = 0.869$ ,  $p < 10^{-10}$ ), which is unsurprising given that both measures quantify the total information flow into a neuron, albeit in slightly different ways. **D** However, there was a significant correlation between average transfer entropy and local clustering coefficient ( $r = 0.44$ ,  $p < 10^{-10}$ ), which shows that the local community structure of a neuron reflects the associated intensity of information flow. **E** The triadic synergy was positively correlated with the in-strength of the target neuron ( $r = 0.657$ ,  $p < 10^{-10}$ ), replicating the findings of (1), as well as with the local clustering coefficient ( $r = 0.653$ ,  $p < 10^{-10}$ ), suggesting that the extended local neighborhood structure plays an important role for computation.

## 14 2. Supplementary Materials & Methods

15 **A. Behavioral Task.** Fig. 1 in the main text illustrates the time course of the behavioral task described in detail previously  
 16 (2, 3). Monkeys were trained to perform a mixed free-choice and instructed delayed grasping task, with the exception of monkey  
 17 M, which was trained to perform only a instructed delayed grasping task. They were seated in front of a handle that could  
 18 be grasped in two different ways and visual cues were displayed on a masked monitor that was superimposed on the handle  
 19 using a beam splitter mirror. Trials started after the monkey placed both hands (for monkey S) or one hand (for monkey Z  
 20 and M) on the resting positions. For monkey Z and M, the non-task relevant arm was comfortably restrained in an acrylic  
 21 glass tube during the experiment. Next, a small red disk was displayed centrally on the monitor, which had to be fixated for  
 22 a variable period of 600 to 1000ms (fixation epoch). After the fixation epoch, cues in the form of larger disks were shown  
 23 next to the fixation disk for 300ms and the handle was illuminated. In the instructed context, one of two discs was displayed  
 24 instructing the monkey about the required grip type (power or precision; cue epoch). In the free-choice context both discs were

25 displayed indicating the monkey to freely choose between the two grip types. After the cue was turned off, the monkey had to  
26 remain steady for a variable time of 1100 to 1500ms (memory epoch). The turning off of the central fixation disk instructed  
27 the monkey to reach and grasp the target with the required grip type (movement epoch) to receive a liquid reward. Note that  
28 to encourage the monkey to perform both grip types during the free-choice context, the reward was iteratively reduced every  
29 time the monkey repeatedly chose the same grip type (fraction of power grip selections:  $38.5 \pm 4.2\%$  SD and  $53.3 \pm 5.2\%$  SD for  
30 S and Z, respectively; Note that no choice ratio is available for monkey M, since he performed only instructed trials). All trials  
31 were randomly interleaved and executed in darkness. Note that the behavioral task also contained delayed instructed trials for  
32 monkey S and Z, which were not analyzed in this study. To increase the reliability of the information dynamics estimation,  
33 instructed and free choice trials for the same grip type were pooled for all further analyses.

34 **B. Electrode Implantation and Data Recordings.** Surgical procedures have been described in detail previously (2, 3). Briefly,  
35 two floating microelectrode arrays (FMAs; Microprobes for Life Sciences; 32 electrodes; spacing between electrodes:  $400\mu\text{m}$ ;  
36 length: 1.5 to 7.1 mm monotonically increasing to target grey matter along the sulcus) were implanted per area in the ventral  
37 premotor cortex (area F5), in the anterior intraparietal area (AIP), and in monkey M also in the primary motor cortex (M1)  
38 for a total of 128 electrodes for monkey S and Z, and 192 electrodes for monkey M. Monkeys S and M were implanted in the  
39 left and monkey Z and the right hemispheres (Fig. 1.B. in the main text).

40 Extracellular signals from the implanted arrays were amplified and digitally stored using a 128-channel recording system for  
41 monkey S and Z (Cerebus, Blackrock Microsystems, sampling rate 30 kS/s, 0.6–7500Hz band-pass hardware filter) and a 256  
42 channel Tucker-Davis system for monkey M (TDT RZ2; sampling rate 24.414 kS/s, 0.6–10,000 Hz band-pass hardware filter)  
43 while the monkeys performed the delayed grasping task. All data were saved to disk and analyzed using custom MATLAB  
44 code (The Mathworks Inc., Natick, MA).

45 **C. Data Preprocessing.** For spike detection, the broadband signals were first low-pass filtered with a median filter (window  
46 length 3ms) and the result subtracted from the raw signal, corresponding to a nonlinear high-pass filter. The signal was  
47 then low-pass filtered (4th order non-causal Butterworth filter, fc: 5000 Hz). To eliminate common noise sources, principal  
48 component (PC) artifact cancellation was applied for all electrodes of each array, as described previously (3, 4). To ensure that  
49 no true spikes were eliminated from individual channels, PCs with any normalized coefficient greater than 0.36 (conservatively  
50 chosen) were retained. Spike waveforms were detected and semi-automatically sorted using a modified version of the offline  
51 spike sorter WaveClus (3, 5, 6).

52 Units were classified as single- or non-single unit based on five criteria:

- 53 1. The presence of short (1–2ms) intervals in the inter-spike interval histogram for single units;
- 54 2. The similarity of all waveforms of each unit at each time point;
- 55 3. The separation of waveform clusters in the projection of the first 13 features (a combination for optimal discriminability  
56 of PCs, single values of the wavelet decomposition, and samples of spike waveforms) detected by WaveClus;
- 57 4. The presence of well-known waveform shapes characteristics for single units;
- 58 5. The shape of the inter-spike interval distribution.

59 After the semiautomatic sorting process, redetection of the different average waveforms (templates) was done to detect  
60 overlaid waveforms (3, 7). To achieve this, filtered signals were convolved with the templates starting with the biggest waveform.  
61 Independently for each template, redetection and resorting was run automatically using a 32-dimensional linear discriminate  
62 analysis for classification of waveforms. After spike identification, the target template was temporally matched and subtracted  
63 from the filtered signal of the corresponding channel to reduce artifacts during the detection of the next template. This  
64 procedure allowed us to detect spikes with a temporal overlap up to 0.2ms. Unit isolation was evaluated again, based on the  
65 five criteria mentioned above, to determine the final classification of all units into single or non-single units. Stationarity of  
66 firing rate was checked for all units and in case it was not stable over the entire recording session (more than 30% change in  
67 firing rate between the first 10 min and the last 10 min of recording) the unit was excluded from further analyses (< 3% of all  
68 single units). Note that only well isolated single neurons based on the five criteria above were used for all further analysis.

69 For the evaluation of the average firing rates of individual neurons per condition and over time, spike events of all well  
70 isolated neurons were binned in non-overlapping 1-ms windows resulting in continuous spike count signals sampled with 1 kHz.  
71 Next, spiking signals were low pass filtered with a Gaussian window (= 50 ms) and aligned to cue onset and movement onset  
72 (cue onset: -450 to 1250 ms, and movement onset: -450 to 150 ms). Data were aligned to cue and movement onset because  
73 neural activity was locked to both events and because the variable memory period length differed between trials. The time  
74 range of the alignments was chosen in order to have an as small as possible overlap and an as smooth as possible transition  
75 between both periods. Finally, average firing rates were calculated by averaging over all trials and alignments per condition and  
76 neuron.

77 **D. Sliding Window Analysis.** To assess how effective connectivity patterns change with the behavior of the macaque, we made  
 78 use of a sliding-windows analysis (8). First, spike events of all well isolated neurons were binned in non-overlapping 5-ms bins  
 79 resulting in a sampling rate of 200Hz. Second, we used 800 ms windows, incremented with 100 ms tied to either the onset  
 80 of the cue condition (starting with -800ms from the onset of the cue and continuing for 1700 ms), or the onset of movement  
 81 (starting with -800 ms from the onset of movement and continuing for 600 ms.) The sliding windows were aligned to the cue and  
 82 movement onset due to the reasons mentioned above. The result was  $\approx 900$  individual slices across the 10 different recordings.

83 For each of these slices, we inferred a single multivariate transfer entropy network using the IDTxl package (9), as well as  
 84 the local active information storage, and triadic synergies following the pipeline outlined in (1, 10).

85 We chose the sliding window approach to temporal localization instead of the more fine-grained analysis of local information  
 86 dynamics (11) to ensure that we could see how the overall network topology changed in time: a local information approach  
 87 would have improved our temporal resolution but at the cost of providing a static network, since fixation, cue, and movement  
 88 conditions would need to be aggregated to construct a single joint probability distribution (which the system presumably visits  
 89 different parts of in different conditions, which the local analysis would reveal). This would have precluded a dynamic network  
 90 approach, which is a core aspect of this study.

91 **E. Active Information Storage.** Active information storage (*AIS*) is arguably the simplest of the three information dynamics  
 92 explored here, and quantifies how much information about the next state of the neuron is encoded in the past  $k$  states (11).  
 93 *AIS* can be thought of as a measure of the “memory” capacity of the neuron: if every subsequent state is chosen at random,  
 94 then  $AIS = 0$ , as knowing the past does nothing to reduce our uncertainty about the mediate future, however if the past states  
 95 of the neuron affects the probability of a particular next state, then the system can be thought of as “remembering” that  
 96 information and “using” it when deciding what the next state will be (note the scare quotes). A simple example might be the  
 97 refractory period that follows an action potential: following an action potential, most neurons cannot immediately fire again,  
 98 as the correct charge needs to be built up. Consequently, an observer attempting to model the dynamics of a single neuron  
 99 would know that the probability of a spike goes down if the neuron is known to have fired in some previous time-window, and  
 100 this would be reflected in the *AIS* measure. For a more involved discussion of *AIS* in understanding neural dynamics see (12).

101 The *AIS* of a single variable  $X$  at time  $t$  is given as the mutual information between the immediate state of  $X$  at time  $t$  and  
 102 the embedded joint-state of the past  $k$  time-steps (the embedding here is similar to a Takens embedding (13)):

$$103 \quad AIS^{-k}(X) = I(X_{t-1}^{-k}; X_t) \quad [1]$$

104 Intuitively, this can be understood as measuring how much knowledge of the joint past reduces our uncertainty about the  
 105 immediate future. The free parameter  $k$  indicates how many steps into the past we want to consider when calculating the *AIS*  
 106 and should be chosen with some care. If  $k$  is too small, then we run the risk of missing out on relevant information from more  
 107 than  $k$  steps in the past and we will under-estimate the true *AIS*. On the other hand, if  $k$  is too large, then we run the risk of  
 108 under-sampling the joint-probability space and over-estimating the true *AIS*.

109 In this work, we set  $max\ k=3$ , which given 5 ms bins works out to a considered history of 15 ms (based on prior work  
 110 reported in (14, 15)), and then used the IDTxl package (9) to infer an optimal non-uniform embedding. The IDTxl package  
 111 has built-in algorithms for selecting an optimal embedding based on hierarchical significance testing and min/max statistical  
 112 tests (for detail see (16) and the IDTxl documentation. Briefly, the significance of the *AIS* was computed by comparing the  
 113 empirical value to a null distribution of surrogate time series, where were generated by shuffling the empirical time series  
 114 in 25 ms windows. This localized shuffling randomizes short-term correlations between neurons, while preserving long-term  
 115 variability in firing rates and helps correct for nonstationarities in the data. We used 2000 shuffled nulls for the min/max  
 116 statistics, and 5000 shuffled nulls each for the omnibus and maximum sequence testing. Following (10, 17), the *AIS* of a neuron  
 117 was normalized by dividing it by the total Shannon entropy of the neuron. This provides a simple correction for variable firing  
 118 rates, removing the confound that higher-entropy neurons have a greater capacity for any information dynamic.

119 **F. Multivariate Transfer Entropy Networks.** While the *AIS* is restricted to understanding the information dynamics of a single  
 120 neuron (how it is “remembered” through time), the transfer entropy (*TE*) describes how information “flows” from one source  
 121 neuron (or a set of source neurons) to a single target neuron (11, 18, 19) For a source  $X$  and a target  $Y$ ,  $TE(X \rightarrow Y)$  is given  
 122 by the mutual information between  $X$ ’s past and  $Y$ ’s immediate next state, conditioned on  $Y$ ’s own past.

$$123 \quad TE^{k,l}(X \rightarrow Y) = I(X_{-k:t-1}; Y_t | Y_{-l:t-1}) \quad [2]$$

124 By conditioning on  $Y$ ’s past, we are able to extract the information that  $X$ ’s past provides about  $Y$ ’s future *above and*  
 125 *beyond the AIS in Y*. Transfer entropy has become an established tool in modeling neural data (1, 20–23). A common technique  
 126 is to use transfer entropy to construct an effective connectivity graph meant to model the directed synaptic structure of the  
 127 underlying biological network, to reveal properties like rich clubs (10, 24), multiplex structures (25), and communities (26).

128 The “classical” transfer entropy has a significant limitation, however that it is strictly bivariate, and consequently blind to  
 129 higher-order information dynamics. Consider the case of two source neurons  $A, B$  synapsing onto a single single target neuron  
 130  $C$ , which implements  $C_t = XOR(A_{t-1}, B_{t-1})$ . Due to the synergistic nature of the logical XOR, bivariate transfer entropy will  
 131 not find any relationship between  $A, B$  and  $C$ , since information about  $C_t$  is only disclosed by the joint pasts of  $A$  and  $B$   
 132 considered together. To address this, we can use the conditional transfer entropy, which quantifies the information flow from  
 133 one neuron to another *in the context of other neurons in the system*. Formally:

$$mTE^{k,l,m}(X \rightarrow Y|\mathbf{Z}) = I(X_{-k:t-1}; Y_t|Y_{-l:t-1}, \mathbf{Z}_{-m:t-1}) \quad [3]$$

Where  $\mathbf{Z}$  can be a multidimensional variable. Note again that each variable can have a different lag, to account for differences in the intrinsic dynamics in each element. In our simple logical XOR example,  $TE(A \rightarrow C) = 0$  bit, but  $TE(A \rightarrow C|B) = 1$  bit.

For a would-be network neuroscientist, this presents an optimization problem: for a pair of neurons  $X$  and  $Y$ , how do we find the smallest set of neurons  $Z$  such that the context  $Z$  provides discloses *all* the relevant information flow from  $X$  to  $Y$ . The answer is the multivariate transfer entropy ( $mTE$  inference, detailed in (16)), which uses greedy optimization and multi-level statistical hypothesis testing to define a “parent” set for every neuron in the network, from which the optimal conditional transfer entropy between every parent in the parent set and the target neuron can be derived. Significance testing was done using the same hierarchical testing described above, with null distributions constructed from shuffled time series in 25ms windows. Work using simulated data has shown that the bivariate and multivariate transfer entropies return networks with strikingly different topologies and that the multivariate transfer entropy networks are reliably closer to the “ground truth” (27, 28). It has been established previously that non-trivial synergistic information dynamics exist in biological neural networks (10, 17, 29), suggesting that bTE, which is known to be blind to synergistic relationships, is missing important aspects of the system’s dynamics.

As with the *AIS*, the choice of embedding parameters is important, and to maintain consistency, we again set the maximal  $k$  value to 3, and used the IDTxI package (9) to find optimal non-uniform embeddings for each neuron. Due to the large number of neurons recorded, we inferred the parent set of each neuron independently and constructed a putative  $mTE$  network post-hoc without correcting for familywise error rates at the whole-network level (every edge was corrected for multiple comparisons). This is an acknowledged limitation of our inference, however the computational requirements for a full, error-corrected inference are beyond our capabilities at present. It may be possible that a subset of edges inferred are false-positives, although we do not anticipate that enough false positives would have passed the otherwise stringent threshold to substantively compromise the overall analysis.

**F.1. Density, Rich Club Coefficient & Clustering Coefficient.** For a directed network  $G = (V, E)$ , where  $V$  is the vertex set and  $E$  is the edge set, the density of the network is given as:

$$\frac{|E|}{|V|^2 - |V|} \quad [4]$$

Which records the ratio of the number of edges that exist in the network to the total number of edges that could exist after self-loops are removed. For processing networks of neurons, such as used in this study, network density reflects the amount of effective connections between neurons involved in processing at a given time and condition.

For a directed, weighted graph, the local clustering coefficient for a node  $v$  is given by:

$$c_v = \frac{1}{deg(v)(deg(v) - 1) - 2deg^{-1}(v)}T(v) \quad [5]$$

where  $deg(v)$  is the sum of the in- and out-degrees of  $v$ ,  $deg^{-1}$  is the reciprocal of the degree of  $v$ , and  $T(v)$  counts the number of directed triangles that  $v$  participates in. We used the Networkx clustering toolbox (30) for this calculation. The average clustering coefficient for the whole network is given by:

$$C(G) = \frac{1}{|V|} \sum_{v \in V} c_v \quad [6]$$

Which is simply the unweighted average of each local clustering coefficient. Finally, the average clustering coefficient was normalized by the corresponding average of surrogate clustering coefficients. surrogate clustering coefficients were estimated based on 1000 surrogate networks, as described in detail in the next subsection. For processing networks of neurons, such as used in this study, the local clustering coefficient reflects groups of effectively interconnected neurons involved in processing at a given time and condition.

The rich club coefficient quantifies the extent to which nodes of a network with a high number of connections are more strongly connected with each other than expected by chance (31, 32). We calculated a modified version of the original weighted rich club coefficient as described in detail in the following (10). The weighted rich club coefficient was calculated separately for all effective mTV networks (23 time windows x 2 grasping conditions). First, all neurons per networks were sorted by the combined in and out degree to obtain a degree rank  $r_{deg}$  per neuron. Second, the weighted rich club coefficient  $\Phi_w(r_{deg})$  was consecutively calculated given by:

$$\Phi_w(r_{deg}) = \frac{W_{r_{deg}}}{r_{deg}^2 - r_{deg}} \quad [7]$$

with  $W_{r_{deg}}$  denoting the sum of weighted connections of the subset of neurons with a degree rank  $> r_{deg}$ , and with  $r_{deg}^2 - r_{deg}$  denoting the maximum possible number of connections of the same subset. Since neurons with a high degree have an increased probability by chance to be connected to other neurons with a high degree, the weighted rich club coefficient needs to be



184 normalized by surrogate data based on networks with the same degree and ideally strength distribution. The estimation of the  
 185 surrogate networks is described in detail below. In a third step, each rich club value was normalized by the corresponding  
 186 average of 1000 surrogate weighted rich club coefficients. Finally, the normalized weighted rich coefficients were resampled  
 187 to 1 to 100 using linear interpolation to average across different recording sessions with different numbers of neurons. For  
 188 processing networks of neurons, such as used in this study, the normalized rich club coefficient shows the degree to which a  
 189 central processing center is present at a given time and condition.

190 **F.2. Surrogate Networks.** To estimate the normalized cluster coefficient, the normalized rich club coefficient and for statistical  
 191 purposes we generated 1000 partitions of surrogate networks for each inferred multivariate transfer entropy network (21 time  
 192 windows  $\times$  2 conditions  $\times$  10 recording sessions). Surrogate networks were generated by first shuffling network connections  
 193 and second reassigning connection weights. Networks of neurons estimated from simultaneous extracellular recordings are  
 194 constrained by multiple anatomical and technical factors. To ensure that the above network analyses and statistics are not biased  
 195 by these factors, network properties affected by these factors should be preserved in the surrogate networks. Several studies  
 196 have shown, that the number and strength of neuronal connectivity decreases with spatial distance (3, 33, 34). Additionally,  
 197 the spatial electrode configuration on each array as well as the configuration of the recording arrays to each other results  
 198 in a spatial inhomogeneous subsampling of neurons (3, 35). To account for both, we held the number of connections on the  
 199 same electrode, the same array, the same cortical area, and the different inter-area connections the same and matched the  
 200 average connection strength per distance category as close as possible. Cortical neurons also have an increased probability to  
 201 be reciprocally connected to each other (36). For this reason, we also held the ratio of reciprocal to unidirectional connections  
 202 per distance category the same. Furthermore, for the normalization of the rich club coefficient it is necessary that the number  
 203 of connections per neuron is preserved because strongly connected neurons have an increased probability of being connected to  
 204 each other by chance (31, 32). However, the same is true for the connection strength per neuron, which has been ignored in the  
 205 literature so far. We therefore not only held the number of connections per neuron the same, but also matched the connection  
 206 strength per neuron as close as possible. To our knowledge the described above surrogate network method is more conservative  
 207 than any other method used in the field, which emphasizes the validity of the results based on this surrogate method.

208 **F.3. Cluster-Based Significance Testing.** For the statistical testing of increased rich club and clustering coefficient over the time  
 209 course of the task, we performed cluster-based surrogate tests. Statistical testing was performed across recording sessions and  
 210 separate for the power and precision condition (Fig. 1.A. in the main text) (3, 37). The testing procedure was the same in both  
 211 cases and the same set of surrogate networks was used as described above. The computation of the cluster-based surrogate  
 212 tests was performed as following:

- 213 1. Test values (rich club coefficient or rich club coefficient) were calculated separately for all surrogate networks of all time  
 214 windows and recording sessions.
- 215 2. Normalize all surrogate test values by dividing the average surrogate test values of the corresponding time window and  
 216 recording session (normalized rich club coefficient or normalized rich club coefficient).
- 217 3. Average all surrogate test values per partition and time window (for the normalized rich club coefficient the interval  
 218 between the 83rd and 95th percentiles) to obtain one value per network.
- 219 4. Calculate the surrogate t-values across recording sessions for all partitions and time windows.
- 220 5. Select all surrogate t-values larger than a thresholding criterion and cluster and sum them on the basis of temporal  
 221 adjacency.
- 222 6. Take the largest summed surrogate t-value per partition to construct a distribution of largest summed surrogate t-values.
- 223 7. Repeat step 1-5 for the recorded test values.
- 224 8. For every summed t-value calculate the proportion of surrogate t-values that are larger than the recorded summed  
 225 t-values, which corresponds to the p-value.
- 226 9. Compare each p-value with a critical alpha-level (0.05 in all cases).

227 Note that this single comparison replaces the multiple comparisons of the test-values over time.

228 **G. mTE and AIS Distribution Similarity Analysis.** Similarity matrices derived from the time-resolved TE and AIS analysis  
 229 underwent clustering and community detection to extract, in a purely data-driven way, time periods that had a distinct TE  
 230 similarity structure. To create similarity matrices for the distribution of AIS values across the nodes, we created a matrix  
 231 where cell  $ij$  gives the cosine similarity between the vector of AIS values across all nodes in the  $i^{th}$  and  $j^{th}$  windows. Cosine  
 232 similarity is given as:

$$233 \text{Sim}(X, Y) = \frac{\langle X, Y \rangle}{\|X\| \times \|Y\|} \quad [8]$$

234 Where  $\langle X, Y \rangle$  is the dot product of  $X$  and  $Y$ , and  $\|X\|$  is the norm of  $X$ . The implementation we used was from the  
235 Scikit-Learn Pairwise Comparisons package.

236 The mTE pipeline was the same, although we took the cosine similarity of the flattened adjacency matrices. First, similarity  
237 matrices were aggregated across the 10 trial repetitions by taking the mean. This resulted in a single 46x46 element matrix for  
238 both mTE and AIS. These matrices were then clustered using a version of modularity maximization (employing the Potts null  
239 model) and multi-resolution consensus clustering (38). The resolution parameter, used by the Louvain algorithm, was stepped  
240 through a range of 1,000 values covering modular partitions yielding between 2 and 46 modules (the minimal and maximal  
241 number of modules possible). The resulting 1,000 partitions were aggregated into a single co-classification matrix which was  
242 scaled between followed by subtraction of an analytic null that captures the expected co-classification (mean propensity for  
243 each node pair to be grouped in the same community) under random permutation of the module assignments (38). The  
244 resulting scaled co-classification matrices were then subjected to consensus clustering with  $\tau = 0$ . The level of  $\tau$  corresponds to  
245 the (constant) null. The resulting consensus communities correspond to time steps that are clustered together based on the  
246 similarity of their mTE/AIS similarities. Variations in the number of samples (between 100 and 10,000) and range of resolution  
247 parameter (2-23; 2-10) had no effect on the cluster boundaries.

248 **H. Synergy & Partial Information Decomposition.** The final information dynamic is *information modification*, which describes  
249 information that is somehow non-trivially altered by the interaction of two or more incoming "information streams" (11). We  
250 operationalize this notion with the synergy, which represents information that is, in some sense, "greater than the sum of its  
251 parts."

252 Synergy is defined as all the information about a target  $Y$  that can only be learned when observing two sources,  $X_1$  and  $X_2$   
253 jointly. The *partial information decomposition* provides a framework for doing this, decomposing the joint mutual information  
254  $I(X_1, X_2; Y)$  into:

$$I(X_1, X_2; Y) = \text{Red}(X_1, X_2; Y) + \text{Syn}(X_1, X_2; Y) + \text{Unq}(X_1; Y|X_2) + \text{Unq}(X_2; Y|X_1) \quad [9]$$

255 Where  $\text{Red}()$  indicates the information about  $Y$  that can be extracted from both  $X_1$  or  $X_2$ ,  $\text{Unq}()$  indicates the information  
256 that is uniquely disclosed by only  $X_1$  or  $X_2$ , and  $\text{Syn}()$  indicates the information about  $Y$  that is disclosed by the joint states  
257 of  $X_1$  and  $X_2$  together and no simpler combination of elements.

258 While PID provides an elegant structure with which to understand the decomposition of information, it does not specify  
259 how exactly to calculate any of the desired values. We used the built-in PID solver provided by IDTxL.

260 **H.1. Redundancy / Synergy Bias.** It is known that different systems can be variously dominated by redundant or synergistic  
261 information dynamics (39, 40). We hypothesized that the fixation/cue states would have a different ratio of synergistic and  
262 redundant information dynamics. The idea of an explicitly normalized redundancy/synergy ratio has been proposed in (40),  
263 who found that topologically similar systems can nevertheless have strongly different distributions of partial information over  
264 the PI lattice. To calculate the redundancy/synergy ratio ( $RSR$ ), we normalize the relevant PI-atoms by the overall joint  
265 mutual information:

$$\bar{S}(X_1, X_2; Y) = \frac{\text{Syn}(X_1, X_2; Y)}{I(X_1, X_2; Y)} \quad [10]$$

$$\bar{R}(X_1, X_2; Y) = \frac{\text{Red}(X_1, X_2; Y)}{I(X_1, X_2; Y)} \quad [11]$$

268 The ratio is then:

$$RSR(X_1, X_2; Y) = \log\left(\frac{\bar{R}}{\bar{S}}\right) \quad [12]$$

270 A value greater than zero indicates a redundancy-dominated dynamic, while a value less than zero indicates a synergy  
271 dominated dynamic.

## 272 References

- 273 1. NM Timme, et al., High-Degree Neurons Feed Cortical Computations. *PLOS Comput. Biol.* **12**, e1004858 (2016) Number:  
274 5 Publisher: Public Library of Science.
- 275 2. JA Michaels, B Dann, RW Intveld, H Scherberger, Predicting Reaction Time from the Neural State Space of the Premotor  
276 and Parietal Grasping Network. *J. Neurosci.* **35**, 11415–11432 (2015) Publisher: Society for Neuroscience Section: Articles.
- 277 3. B Dann, JA Michaels, S Schaffelhofer, H Scherberger, Uniting functional network topology and oscillations in the  
278 fronto-parietal single unit network of behaving primates. *eLife* **5**, e15719 (2016) Publisher: eLife Sciences Publications,  
279 Ltd.
- 280 4. PG Musial, SN Baker, GL Gerstein, EA King, JG Keating, Signal-to-noise ratio improvement in multiple electrode  
281 recording. *J. Neurosci. Methods* **115**, 29–43 (2002).



- 282 5. RQ Quiroga, Z Nadasdy, Y Ben-Shaul, Unsupervised Spike Detection and Sorting with Wavelets and Superparamagnetic  
283 Clustering. *Neural Comput.* **16**, 1661–1687 (2004).
- 284 6. A Kraskov, N Dancause, MM Quallo, S Shepherd, RN Lemon, Corticospinal Neurons in Macaque Ventral Premotor  
285 Cortex with Mirror Properties: A Potential Mechanism for Action Suppression? *Neuron* **64**, 922–930 (2009).
- 286 7. SN Gozani, JP Miller, Optimal discrimination and classification of neuronal action potential waveforms from multiunit,  
287 multichannel recordings using software-based linear filters. *IEEE Transactions on Biomed. Eng.* **41**, 358–372 (1994)  
288 Conference Name: IEEE Transactions on Biomedical Engineering.
- 289 8. AD Savva, GD Mitsis, GK Matsopoulos, Assessment of dynamic functional connectivity in resting-state fMRI using the  
290 sliding window technique. *Brain Behav.* **9** (2019).
- 291 9. P Wollstadt, et al., IDTxl: The Information Dynamics Toolkit xl: a Python package for the efficient analysis of multivariate  
292 information dynamics in networks. *J. Open Source Softw.* **4**, 1081 (2019) Number: 34.
- 293 10. SP Faber, NM Timme, JM Beggs, EL Newman, Computation is concentrated in rich clubs of local cortical networks.  
294 *Netw. Neurosci.* pp. 1–21 (2018).
- 295 11. JT Lizier, *The Local Information Dynamics of Distributed Computation in Complex Systems*, Springer Theses. (Springer  
296 Berlin Heidelberg, Berlin, Heidelberg), (2013).
- 297 12. M Wibral, J Lizier, S Vögler, V Priesemann, R Galuske, Local active information storage as a tool to understand  
298 distributed neural information processing. *Front. Neuroinformatics* **8** (2014) Publisher: Frontiers.
- 299 13. F Takens, Detecting strange attractors in turbulence in *Dynamical Systems and Turbulence, Warwick 1980*, eds. D Rand,  
300 LS Young. (Springer Berlin Heidelberg, Berlin, Heidelberg) Vol. 898, pp. 366–381 (1981) Series Title: Lecture Notes in  
301 Mathematics.
- 302 14. A Mason, A Nicoll, K Stratford, Synaptic transmission between individual pyramidal neurons of the rat visual cortex in  
303 vitro. *The J. Neurosci. The Off. J. Soc. for Neurosci.* **11**, 72–84 (1991).
- 304 15. P Barthó, et al., Characterization of Neocortical Principal Cells and Interneurons by Network Interactions and Extracellular  
305 Features. *J. Neurophysiol.* **92**, 600–608 (2004) Publisher: American Physiological Society.
- 306 16. L Novelli, P Wollstadt, P Mediano, M Wibral, JT Lizier, Large-scale directed network inference with multivariate transfer  
307 entropy and hierarchical statistical testing. *Netw. Neurosci.* **3**, 827–847 (2019) Number: 3.
- 308 17. SP Sherrill, NM Timme, JM Beggs, EL Newman, Correlated activity favors synergistic processing in local cortical networks  
309 in vitro at synaptically relevant timescales. *Netw. Neurosci. (Cambridge, Mass.)* **4**, 678–697 (2020).
- 310 18. T Schreiber, Measuring Information Transfer. *Phys. Rev. Lett.* **85**, 461–464 (2000) Number: 2.
- 311 19. CJ Quinn, TP Coleman, N Kiyavash, NG Hatsopoulos, Estimating the directed information to infer causal relationships  
312 in ensemble neural spike train recordings. *J. Comput. Neurosci.* **30**, 17–44 (2011).
- 313 20. S Ito, et al., Large-Scale, High-Resolution Multielectrode-Array Recording Depicts Functional Network Differences of  
314 Cortical and Hippocampal Cultures. *PLOS ONE* **9**, e105324 (2014) Number: 8.
- 315 21. M Wibral, R Vicente, M Lindner, Transfer Entropy in Neuroscience in *Directed Information Measures in Neuroscience,*  
316 *Understanding Complex Systems*, eds. M Wibral, R Vicente, JT Lizier. (Springer, Berlin, Heidelberg), pp. 3–36 (2014).
- 317 22. NM Timme, C Lapish, A Tutorial for Information Theory in Neuroscience. *eNeuro* **5**, ENEURO.0052–18.2018 (2018)  
318 Number: 3.
- 319 23. S Stramaglia, T Scagliarini, BC Daniels, D Marinazzo, Quantifying Dynamical High-Order Interdependencies From the  
320 O-Information: An Application to Neural Spiking Dynamics. *Front. Physiol.* **11** (2021) Publisher: Frontiers.
- 321 24. S Nigam, et al., Rich-Club Organization in Effective Connectivity among Cortical Neurons. *J. Neurosci.* **36**, 670–684  
322 (2016) Publisher: Society for Neuroscience Section: Articles.
- 323 25. N Timme, et al., Multiplex Networks of Cortical and Hippocampal Neurons Revealed at Different Timescales. *PLOS ONE*  
324 **9**, e115764 (2014) Publisher: Public Library of Science.
- 325 26. M Shimono, JM Beggs, Functional Clusters, Hubs, and Communities in the Cortical Microconnectome. *Cereb. Cortex* **25**,  
326 3743–3757 (2015).
- 327 27. L Novelli, JT Lizier, Inferring network properties from time series using transfer entropy and mutual information: Validation  
328 of multivariate versus bivariate approaches. *Netw. Neurosci.* **5**, 373–404 (2021).
- 329 28. M Ursino, G Ricci, E Magosso, Transfer Entropy as a Measure of Brain Connectivity: A Critical Analysis With the Help  
330 of Neural Mass Models. *Front. Comput. Neurosci.* **14** (2020) Publisher: Frontiers.
- 331 29. N Timme, W Alford, B Flecker, JM Beggs, Synergy, redundancy, and multivariate information measures: an experimental-  
332 ist's perspective. *J. Comput. Neurosci.* **36**, 119–140 (2014) Number: 2.
- 333 30. A Hagberg, D Schult, P Swart, Exploring Network Structure, Dynamics, and Function using NetworkX. (2008).
- 334 31. V Colizza, A Flammini, MA Serrano, A Vespignani, Detecting rich-club ordering in complex networks. *Nat. Phys.* **2**,  
335 110–115 (2006).
- 336 32. MPvd Heuvel, RS Kahn, J Goñi, O Sporns, High-cost, high-capacity backbone for global brain communication.  
337 *Proc. Natl. Acad. Sci.* **109**, 11372–11377 (2012) Publisher: National Academy of Sciences Section: Biological Sciences.
- 338 33. MA Smith, A Kohn, Spatial and Temporal Scales of Neuronal Correlation in Primary Visual Cortex. *J. Neurosci.* **28**,  
339 12591–12603 (2008) Publisher: Society for Neuroscience Section: Articles.
- 340 34. H Markram, et al., Reconstruction and Simulation of Neocortical Microcircuitry. *Cell* **163**, 456–492 (2015) Publisher:  
341 Elsevier.
- 342 35. S Gerhard, et al., The Connectome Viewer Toolkit: An Open Source Framework to Manage, Analyze, and Visualize

- 343 Connectomes. Front. Neuroinformatics **0** (2011) Publisher: Frontiers.
- 344 36. R Perin, TK Berger, H Markram, A synaptic organizing principle for cortical neuronal groups. Proc. Natl. Acad. Sci. **108**,
- 345 5419–5424 (2011) Publisher: National Academy of Sciences Section: Biological Sciences.
- 346 37. E Maris, R Oostenveld, Nonparametric statistical testing of EEG- and MEG-data. J. Neurosci. Methods **164**, 177–190
- 347 (2007).
- 348 38. LGS Jeub, O Sporns, S Fortunato, Multiresolution Consensus Clustering in Networks. Sci. Reports **8**, 3259 (2018).
- 349 39. F Rosas, PAM Mediano, M Gastpar, HJ Jensen, Quantifying High-order Interdependencies via Multivariate Extensions of
- 350 the Mutual Information. Phys. Rev. E **100**, 032305 (2019) Number: 3 arXiv: 1902.11239.
- 351 40. T Varley, E Hoel, Emergence as the conversion of information: A unifying theory. arXiv:2104.13368 [cs, math] (2021)
- 352 arXiv: 2104.13368.
